# Supplementary material for: Exploring the Cognitive Capacities of Japanese Macaques in a Cooperation Game
Source: MDPI journal article supplement (doi:10.3390/ani11061497), 2021-05-21
Supplement: s1 [file s1]

Supplementary materials for Sigmundson, Stribos, et al. (2021). Exploring the cognitive capacities of Japanese macaques in a cooperation game. *Animals*.

**Table S1.** Summary of Results by Dyad

| Dyad            | Partner Relationship | Total Successes |
|-----------------|----------------------|-----------------|
| James + Ingrid  | Son-Mother           | 228             |
| James + Kate    | Nephew-Aunt          | 175             |
| James + Pippi   | Non-kin              | 145             |
| James + Finn    | Non-kin              | 64              |
| Pippi + Alina   | Daughter-Mother      | 54              |
| Finn + Herta    | Non-kin              | 10              |
| James + Montana | Non-kin              | 10              |
| James + Alina   | Non-kin              | 4               |
| Finn + Krato    | Non-kin              | 3               |
| James + Herta   | Non-kin              | 3               |
| James + Julia   | Non-kin              | 2               |
| James + Krato   | Non-kin              | 2               |
| James + Sandra  | Non-kin              | 1               |
| Kate + Sandra   | Non-kin              | 1               |
| Ingrid + Sandra | Non-kin              | 1               |
| Pippi + Herta   | Non-kin              | 1               |
| Pippi + Kate    | Non-kin              | 1               |
| Pippi + Finn    | Non-kin              | 1               |
| James + Kurtney | Non-kin              | 1               |
| Pippi + Ingrid  | Non-kin              | 1               |

Number of successes during Experiment 1, broken down by dyad. Kin relationship of the dyad is shown in the middle column. Only dyads with at least one successful cooperation are shown. All other possible dyadic combinations can be assumed to have zero successful attempts.

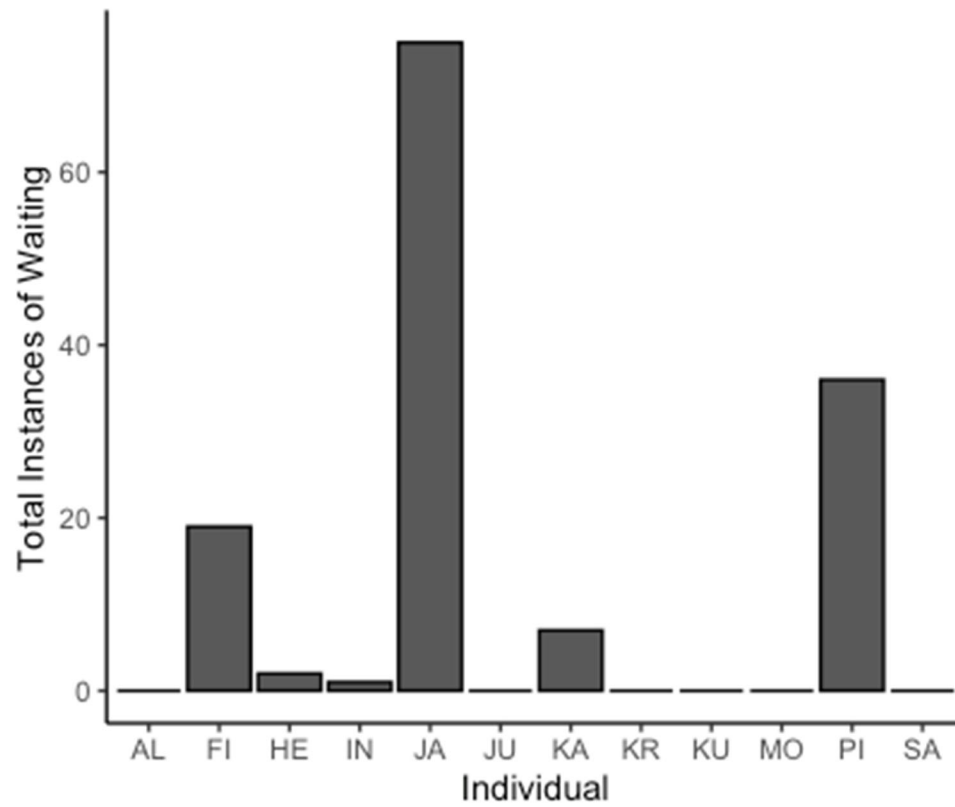

**Figure S1.** Bar graph displaying total instances of waiting during Experiment 1 broken down by individual. Individual labels are composed of the first two letters of the corresponding monkey's name.

**Table S2.** Definitions of Behavioral Variables Recorded during Experiment 2

| <b>Behavior</b>                 | <b>Description</b>                                                                                                                                                                                                                           |
|---------------------------------|----------------------------------------------------------------------------------------------------------------------------------------------------------------------------------------------------------------------------------------------|
| Refusal to cooperate            | Focal has cooperated before in this session with an individual that is currently in the hut waiting close to one of the strings. Focal shows no interest in acting as cooperation partner again with that individual for at least 10 seconds |
| Look in box                     | Focal inspects the box for food rewards prior to cooperation. This involves climbing up on the apparatus and directing gaze to the plexiglass windows of the box                                                                             |
| <i>Stress-related behaviors</i> |                                                                                                                                                                                                                                              |
| Scratch                         | Focal uses finger, hand or foot to rake across own skin                                                                                                                                                                                      |
| Body shake                      | Focal rapidly turns the whole body in at least two different directions alongside the axis of its spine                                                                                                                                      |
| Yawn                            | Focal opens mouth wide and inhales intensely, which can be seen by the expansion of the chest                                                                                                                                                |
| <i>Aggressive behaviors</i>     |                                                                                                                                                                                                                                              |
| Bite                            | Focal places its teeth on the body of another individual and closes its jaws                                                                                                                                                                 |
| Chase                           | Focal runs after another individual for at least 3 meters                                                                                                                                                                                    |
| Grunt                           | Focal makes a low pitch rumbling vocalization with focus toward another individual                                                                                                                                                           |
| Hit                             | Focal slaps another individual with its hand                                                                                                                                                                                                 |
| Lunge                           | Focal jumps a maximum of two body lengths forward toward another individual                                                                                                                                                                  |
| Physical Attack                 | Focal commits at least two consecutive acts of aggression against another individual (may include grab, hit, and/or bite)                                                                                                                    |
| Stare                           | Focal looks intensively at another individual with a straight back and raised eyebrows                                                                                                                                                       |
| Threat                          | Focal moves its head with an O-shaped mouth, retracted lips, and raised eyebrows toward another individual                                                                                                                                   |
